# Supplementary material for: In Vitro Antimicrobial and Antibiofilm Properties and Bioaccessibility after Oral Digestion of Chemically Characterized Extracts Obtained from Cistus × incanus L., Scutellaria lateriflora L., and Their Combination
Source: MDPI journal article supplement (doi:10.3390/foods12091826), 2023-04-28
Supplement: s1 [file s1]

Article

# *In vitro* antimicrobial and antibiofilm properties and bioaccessibility after oral digestion of chemically characterized extracts obtained from *Cistus x incanus* L., *Scutellaria lateriflora* L., and their combination

Hammad Ullah<sup>1,†</sup>, Alessandro Di Minno<sup>1,2,†</sup>, Anna De Filippis<sup>3</sup>, Eduardo Sommella<sup>4</sup>, Daniele Giuseppe Buccato<sup>1</sup>, Lorenza Francesca De Lellis<sup>1</sup>, Hesham R. El-Seedi<sup>5,6</sup>, Shaden A. M. Khalifa<sup>7</sup>, Roberto Piccinocchi<sup>8</sup>, Massimiliano Galdiero<sup>3,9</sup>, Pietro Campiglia<sup>4,10</sup> and Maria Daglia<sup>1,6,\*</sup>

## Supplementary Tables

**Table S1.** Identified compounds in *C. incanus* extract according to molecular formula, *m/z*, and the retention time (RT)

| Name                                                   | Formula     | $\Delta$ [ppm] | <i>m/z</i> | RT [min] | Reference Ion |
|--------------------------------------------------------|-------------|----------------|------------|----------|---------------|
| Punicalin                                              | C34 H22 O22 | 1,04           | 781,0539   | 2,364    | [M-H]-1       |
| Gallic acid                                            | C7 H6 O5    | -4,5           | 169,0135   | 2,731    | [M-H]-1       |
| Galloyl-epigallocatechin                               | C15 H14 O7  | 0,52           | 305,0668   | 3,218    | [M-H]-1       |
| Galloyl-gallocatechin isomer                           | C15 H14 O7  | 0,26           | 305,0668   | 4,718    | [M-H]-1       |
| Chlorogenic acid                                       | C16 H18 O9  | 0,45           | 353,0880   | 4,732    | [M-H]-1       |
| Procyanidin B1                                         | C30 H26 O12 | 0,26           | 577,1353   | 4,808    | [M-H]-1       |
| Caffeoyl-beta-D-hexose                                 | C15 H18 O9  | 0,03           | 341,0878   | 4,924    | [M-H]-1       |
| Taxifolin 3-hexoside                                   | C21 H22 O12 | -0,06          | 465,1038   | 4,928    | [M-H]-1       |
| Corilagin                                              | C27 H22 O18 | 0,33           | 633,0737   | 5,258    | [M-H]-1       |
| Syringic acid                                          | C9 H10 O5   | -3,16          | 197,0449   | 5,576    | [M-H]-1       |
| Chlorogenic acid isomer                                | C16 H18 O9  | 0,37           | 353,0879   | 5,596    | [M-H]-1       |
| 6-Hydroxyluteolin 7-sophoroside                        | C27 H30 O17 | 0,53           | 625,1414   | 5,61     | [M-H]-1       |
| Procyanidin B1 isomer                                  | C30 H26 O12 | 1,61           | 577,1361   | 5,687    | [M-H]-1       |
| Catechin                                               | C15 H14 O6  | 0,9            | 289,0720   | 5,829    | [M-H]-1       |
| Catechin isomer                                        | C15 H14 O6  | -0,01          | 289,0718   | 5,86     | [M-H]-1       |
| Quercetin 3-alpha-L-arabinopyranosyl- (1->6) -hexoside | C26 H28 O16 | 1,21           | 595,1312   | 5,888    | [M-H]-1       |
| Chlorogenic acid isomer                                | C16 H18 O9  | 0,58           | 353,0880   | 6,048    | [M-H]-1       |
| Epigallocatechin 3-gallate                             | C22 H18 O11 | 0,43           | 457,0778   | 6,153    | [M-H]-1       |
| Myricetin 3-hexoside                                   | C21 H20 O13 | 0,88           | 479,0835   | 6,558    | [M-H]-1       |
| Myricetin 3-sambubioside                               | C26 H28 O17 | 0,59           | 611,1257   | 6,612    | [M-H]-1       |
| Epigallocatechin 3-gallate isomer                      | C22 H18 O11 | 0,8            | 457,0780   | 6,621    | [M-H]-1       |
| Myricetin 3- (2"-galloylhexoside)                      | C28 H24 O17 | 0,55           | 631,0944   | 6,71     | [M-H]-1       |
| Quercetin 3,4'-dihexoside                              | C27 H30 O17 | 1,16           | 625,1418   | 6,753    | [M-H]-1       |
| Myricetin 3- (2"-galloylhexoside) isomer               | C28 H24 O17 | 1,04           | 631,0947   | 6,928    | [M-H]-1       |
| Rhamnetin 3-hexoside isomer                            | C22 H22 O12 | 0,2            | 477,1039   | 6,964    | [M-H]-1       |
| Myricetin 3-hexoside isomer                            | C21 H20 O13 | -0,28          | 479,0830   | 6,969    | [M-H]-1       |

|                                                               |             |       |          |       |          |
|---------------------------------------------------------------|-------------|-------|----------|-------|----------|
| Rhamnetin 3-hexoside                                          | C22 H22 O12 | 0,58  | 477,1041 | 6,999 | [M-H]-1  |
| Ferulic acid                                                  | C10 H10 O4  | -3,59 | 193,0499 | 7,011 | [M-H]-1  |
| Quercetin 3- (2Gal-rhamnosyl-robinobioside)                   | C33 H40 O20 | 1     | 755,2048 | 7,038 | [M-H]-1  |
| Taxifolin 5-hexoside isomer                                   | C21 H22 O12 | 0,36  | 465,1040 | 7,071 | [M-H]-1  |
| Quercetin-4'-hexoside                                         | C21 H20 O12 | 0,65  | 463,0885 | 7,13  | [M-H]-1  |
| Phloretin 3',5'-Di-C-hexoside                                 | C27 H34 O15 | 2,1   | 597,1838 | 7,153 | [M-H]-1  |
| Myricetin 3-alpha-L-arabinofuranoside                         | C20 H18 O12 | 0,76  | 449,0729 | 7,233 | [M-H]-1  |
| Quercetin 3-alpha-L-arabinopyranosyl- (1->6) -hexoside isomer | C26 H28 O16 | 0,88  | 595,1310 | 7,24  | [M-H]-1  |
| Taxifolin                                                     | C15 H12 O7  | 0,45  | 303,0512 | 7,277 | [M-H]-1  |
| Catechin 3-O-gallate                                          | C22 H18 O10 | 0,17  | 441,0828 | 7,357 | [M-H]-1  |
| Catechin 3-O-gallate isomer                                   | C22 H18 O10 | 0,51  | 441,0830 | 7,371 | [M-H]-1  |
| Catechin-4-ol 3'-methyl ether<br>3-O-alpha-L-rhamnopyranoside | C22 H26 O11 | 0,02  | 465,1402 | 7,419 | [M-H]-1  |
| Myricetin 3-alpha-L-arabinofuranoside isomer                  | C20 H18 O12 | 0,08  | 449,0726 | 7,481 | [M-H]-1  |
| Ellagic acid                                                  | C14 H6 O8   | -0,3  | 300,9989 | 7,643 | [M-H]-1  |
| Quercetin-3-O-glucopyranoside (isoquercitrin) isomer          | C21 H20 O12 | 0,21  | 463,0883 | 7,732 | [M-H]-1  |
| Myricetin 3-hexoside isomer                                   | C21 H20 O13 | 0,6   | 479,0834 | 7,847 | [M-H]-1  |
| Kaempferol 7- (6"-galloylhexoside)                            | C28 H24 O15 | 1,03  | 599,1049 | 7,886 | [M-H]-1  |
| Myricetin                                                     | C15 H10 O8  | 0,81  | 317,0306 | 7,975 | [M-H]-1  |
| Dihydromyricetin                                              | C15 H12 O8  | 0,96  | 319,0463 | 7,977 | [M-H]-1  |
| Isorhamnetin-O-hexoside                                       | C22 H22 O12 | 0,64  | 477,1042 | 8,047 | [M-H]-1  |
| Guaijaverin isomer                                            | C20 H18 O11 | -0,14 | 433,0776 | 8,205 | [M-H]-1  |
| Quercetin 3-rhamnosyl- (1->6) - (2"-acetylhexoside)           | C29 H32 O17 | 0,82  | 651,1572 | 8,229 | [M-H]-1  |
| Guaijaverin                                                   | C20 H18 O11 | -0,28 | 433,0775 | 8,309 | [M-H]-1  |
| Guaijaverin isomer                                            | C20 H18 O11 | -0,03 | 433,0776 | 8,315 | [M-H]-1  |
| Dicaffoylquinic acid                                          | C25 H24 O12 | 0,25  | 515,1196 | 8,387 | [M-H]-1  |
| Dihydrokaempferol                                             | C15 H12 O6  | 0,73  | 287,0563 | 8,39  | [M-H]-1  |
| Quercetin-3-O-glucopyranoside (isoquercitrin) isomer          | C21 H20 O12 | 0,61  | 463,0885 | 8,488 | [M-H]-1  |
| Trilobatin                                                    | C21 H24 O10 | 0,35  | 435,1298 | 8,61  | [M-H]-1  |
| Isorhamnetin-O-hexoside isomer                                | C22 H22 O12 | 0,51  | 477,1041 | 8,618 | [M-H]-1  |
| Rhamnocitrin 3-rutinoside                                     | C28 H32 O15 | 1,56  | 607,1678 | 8,659 | [M-H]-1  |
| Kaempferol 3-alpha-L-arabinopyranoside isomer                 | C20 H18 O10 | 0,95  | 417,0831 | 8,737 | [M-H]-1  |
| Kaempferol 3-alpha-L-arabinopyranoside                        | C20 H18 O10 | 0,87  | 417,0831 | 8,74  | [M-H]-1  |
| Dicaffoylquinic acid isomer                                   | C25 H24 O12 | 0,78  | 515,1199 | 8,819 | [M-H]-1  |
| Oleuropein                                                    | C25 H32 O13 | 0,88  | 539,1775 | 8,908 | [M-H]-1  |
| Quercetin-4'-hexoside isomer                                  | C21 H20 O12 | 1,59  | 463,0889 | 8,942 | [M-H]-1  |
| Rosmarinic acid                                               | C18 H16 O8  | 0,94  | 359,0776 | 9,07  | [M-H]-1  |
| Quercetin 3- (2G- (E) -p-coumaroylrutinoside)                 | C36 H36 O18 | 1,29  | 377,0881 | 9,098 | [M-2H]-2 |
| Quercetin 3- (6"-p-coumarylglucosyl) (1->2)<br>-rhamnoside    | C36 H36 O18 | 1,86  | 755,1843 | 9,099 | [M-H]-1  |

|                                                            |             |       |          |        |         |
|------------------------------------------------------------|-------------|-------|----------|--------|---------|
| Quercetin                                                  | C15 H10 O7  | 0,82  | 301,0356 | 9,1    | [M-H]-1 |
| Myricetin 3- (6"-p-coumaroylhexoside)                      | C30 H26 O15 | 1,28  | 625,1207 | 9,131  | [M-H]-1 |
| Quercetin 3- (2"-galloyl-alpha-L-arabinopyranoside)        | C27 H22 O15 | 1,05  | 585,0892 | 9,141  | [M-H]-1 |
| Kaempferol 3-glucuronide                                   | C21 H18 O12 | 1,53  | 461,0733 | 9,262  | [M-H]-1 |
| Afzelin                                                    | C21 H20 O10 | 0,43  | 431,0986 | 9,3    | [M-H]-1 |
| Myricetin 3- (6"-p-coumaroylhexoside)                      | C30 H26 O15 | 1,05  | 625,1206 | 9,382  | [M-H]-1 |
| Quercetin 3- (2"-galloyl-alpha-L-arabinopyranoside) isomer | C27 H22 O15 | 0,99  | 585,0892 | 9,408  | [M-H]-1 |
| Quercetin 3- (6"-malonylhexoside)                          | C24 H22 O15 | 0,83  | 549,0891 | 9,428  | [M-H]-1 |
| Quercetin 3- (6"-acetylhexoside)                           | C23 H22 O13 | 0,98  | 505,0993 | 9,43   | [M-H]-1 |
| Kaempferol 3-glucuronide isomer                            | C21 H18 O12 | 1,26  | 461,0731 | 9,442  | [M-H]-1 |
| Quercetin 3-glucuronide                                    | C21 H18 O13 | 0,98  | 477,0679 | 9,447  | [M-H]-1 |
| Daidzein                                                   | C15 H10 O4  | 0,29  | 253,0507 | 9,517  | [M-H]-1 |
| Dihydrokaempferol isomer                                   | C15 H12 O6  | 0,83  | 287,0564 | 9,518  | [M-H]-1 |
| Quercetin 3- (6"-malonylhexoside) isomer                   | C24 H22 O15 | 1,17  | 549,0892 | 9,52   | [M-H]-1 |
| Chlorogenic acid isomer                                    | C16 H18 O9  | 0,5   | 353,0880 | 9,619  | [M-H]-1 |
| Kaempferol 3-glucuronide isomer                            | C21 H18 O12 | 1,3   | 461,0732 | 9,724  | [M-H]-1 |
| Quercetin 3- (6"-malonylhexoside) isomer                   | C24 H22 O15 | 1     | 549,0892 | 9,751  | [M-H]-1 |
| Kaempferol 3- (6"-malonylhexoside)                         | C24 H22 O14 | 0,86  | 533,0941 | 9,983  | [M-H]-1 |
| Afzelin isomer                                             | C21 H20 O10 | 0,61  | 431,0986 | 10,352 | [M-H]-1 |
| Isorhamnetin                                               | C16 H12 O7  | 1,25  | 315,0514 | 10,371 | [M-H]-1 |
| Quercetin 3- (6"-malonylhexoside) isomer                   | C24 H22 O15 | 1,44  | 549,0894 | 10,435 | [M-H]-1 |
| Rhamnocitrin 3-hexoside                                    | C22 H22 O11 | 1,64  | 461,1097 | 10,563 | [M-H]-1 |
| Kaempferol 3- (3"-p-coumarylhexoside)                      | C30 H26 O13 | 0,08  | 593,1301 | 10,667 | [M-H]-1 |
| Quercetin                                                  | C15 H10 O7  | -0,13 | 301,0353 | 10,766 | [M-H]-1 |
| Naringenin                                                 | C15 H12 O5  | 0,3   | 271,0613 | 10,822 | [M-H]-1 |
| Kaempferol 3- (3"-p-coumarylhexoside) isomer               | C30 H26 O13 | 0,37  | 593,1303 | 10,829 | [M-H]-1 |
| Kaempferol 3-glucuronide isomer                            | C21 H18 O12 | 1,47  | 461,0732 | 11,042 | [M-H]-1 |
| Genistein                                                  | C15 H10 O5  | 0,96  | 269,0458 | 11,094 | [M-H]-1 |
| Kaempferol                                                 | C15 H10 O6  | 1,03  | 285,0408 | 11,475 | [M-H]-1 |
| Kaempferol 3- (3"-p-coumarylhexoside) isomer               | C30 H26 O13 | 1,22  | 593,1308 | 12,059 | [M-H]-1 |
| Hesperetin                                                 | C16 H14 O6  | 0,77  | 301,0720 | 12,112 | [M-H]-1 |
| Formononetin                                               | C16 H12 O4  | 0,52  | 267,0664 | 12,254 | [M-H]-1 |
| Quercetin 3-methyl ether                                   | C16 H12 O7  | 0,94  | 315,0513 | 12,5   | [M-H]-1 |
| Kaempferol 3- (3"-p-coumarylhexoside) isomer               | C30 H26 O13 | 0,93  | 593,1306 | 12,57  | [M-H]-1 |
| Myricetin 3,3',5'-trimethyl ether                          | C18 H16 O8  | 1,19  | 359,0777 | 12,651 | [M-H]-1 |
| Kaempferol 3- (2",6"-di- (E) -p-coumarylhexoside)          | C39 H32 O15 | 0,99  | 739,1680 | 12,805 | [M-H]-1 |
| Kaempferol 3- (3",6"-di-p-coumarylhexoside)                | C39 H32 O15 | 1,09  | 739,1678 | 13,039 | [M-H]-1 |

**Table S2.** Identified compounds in *S. lateriflora* extract according to molecular formula, *m/z*, and the retention time (RT)

| Name                                           | Formula     | $\Delta$ [ppm] | <i>m/z</i> | RT [min] | Reference Ion |
|------------------------------------------------|-------------|----------------|------------|----------|---------------|
| Gallic acid                                    | C7 H6 O5    | -4,59          | 169,0135   | 1,588    | [M-H]-1       |
| Chlorogenic acid                               | C16 H18 O9  | 0,76           | 353,0881   | 4,76     | [M-H]-1       |
| Chlorogenic acid dimer                         | C32 H36 O18 | 2,06           | 707,1844   | 5,597    | [M-H]-1       |
| Chlorogenic acid isomer                        | C16 H18 O9  | 0,41           | 353,0880   | 5,609    | [M-H]-1       |
| Chlorogenic acid isomer                        | C16 H18 O9  | 0,6            | 353,0880   | 6,059    | [M-H]-1       |
| Kaempferol-3-O-hexo rhamnoside isomer          | C27 H30 O15 | 0,96           | 593,1518   | 6,312    | [M-H]-1       |
| Carthamidin 7-O-glucuronide                    | C21 H20 O12 | 1,18           | 463,0887   | 6,676    | [M-H]-1       |
| Ferulic acid                                   | C10 H10 O4  | -3,16          | 193,0500   | 6,733    | [M-H]-1       |
| Pentahydroxyflavanone                          | C21 H22 O11 | 0,64           | 449,1092   | 6,846    | [M-H]-1       |
| Schaftoside                                    | C26 H28 O14 | 0,48           | 563,1409   | 6,865    | [M-H]-1       |
| Quercetin-dihexoside                           | C27 H30 O17 | 0,74           | 625,1415   | 6,965    | [M-H]-1       |
| Myricetin-hexoside                             | C21 H20 O13 | 0,12           | 479,0832   | 6,966    | [M-H]-1       |
| Luteolin 7,3'-diglucuronide                    | C27 H26 O18 | 0,87           | 637,1052   | 7,011    | [M-H]-1       |
| Quercetin-hexoside                             | C21 H20 O12 | 0,56           | 463,0885   | 7,129    | [M-H]-1       |
| 6-C-Glucopyranosyldihydrokaempferol            | C21 H22 O11 | 0,95           | 449,1094   | 7,222    | [M-H]-1       |
| Taxifolin                                      | C15 H12 O7  | 0,32           | 303,0512   | 7,272    | [M-H]-1       |
| Quercetin 3-glucuronide                        | C21 H18 O13 | 0,79           | 477,0678   | 7,353    | [M-H]-1       |
| Schaftoside isomer                             | C26 H28 O14 | 0,53           | 563,1409   | 7,39     | [M-H]-1       |
| Luteolin 7-glucuronide                         | C21 H18 O12 | 0,98           | 461,0730   | 7,532    | [M-H]-1       |
| Ellagic acid                                   | C14 H6 O8   | 0,38           | 300,9991   | 7,592    | [M-H]-1       |
| Rutin                                          | C27 H30 O16 | 0,21           | 609,1462   | 7,595    | [M-H]-1       |
| 6-C-beta-D-Hexosyl apigenin                    | C21 H20 O10 | -0,27          | 431,0983   | 7,619    | [M-H]-1       |
| Kaempferol-3-O-hexo rhamnoside                 | C27 H30 O15 | 0,5            | 593,1515   | 7,642    | [M-H]-1       |
| Verbascoside                                   | C29 H36 O15 | 0,65           | 623,1986   | 7,669    | [M-H]-1       |
| Quercetin-3-O-glucopyranoside (isoquercitrin)  | C21 H20 O12 | 0,82           | 463,0886   | 7,686    | [M-H]-1       |
| Persicogenin-hexoside                          | C23 H26 O11 | 0,66           | 477,1406   | 7,754    | [M-H]-1       |
| Ferulic acid isomer                            | C10 H10 O4  | -3,44          | 193,0500   | 7,762    | [M-H]-1       |
| Quercetin-hexoside isomer                      | C21 H20 O12 | 0,72           | 463,0885   | 7,789    | [M-H]-1       |
| Kaempferol 3-hexoside-7-glucuronide            | C27 H28 O17 | 0,38           | 623,1256   | 7,849    | [M-H]-1       |
| Chrysin 8-C-β-d-hexoside                       | C21 H20 O9  | 0,29           | 415,1036   | 7,945    | [M-H]-1       |
| Ferulic acid isomer                            | C10 H10 O4  | -3,63          | 193,0499   | 7,951    | [M-H]-1       |
| Quercetin 4'-methyl ether 3-hexoside           | C22 H22 O12 | 0              | 477,1039   | 8,092    | [M-H]-1       |
| Kaempferol-3-O-hexo rhamnoside isomer          | C27 H30 O15 | 0,7            | 593,1516   | 8,25     | [M-H]-1       |
| Isoorientin 3'-O-glucuronide                   | C27 H28 O17 | 0,48           | 623,1257   | 8,337    | [M-H]-1       |
| Dihydrokaempferol                              | C15 H12 O6  | 0,46           | 287,0562   | 8,382    | [M-H]-1       |
| Hesperetin 7-O-hexoside                        | C22 H24 O11 | 1,35           | 463,1252   | 8,384    | [M-H]-1       |
| Scutellarein 7,4'-dimethyl ether 6-sophoroside | C29 H34 O16 | 0,43           | 637,1777   | 8,442    | [M-H]-1       |
| Luteolin 3',4'-diglucuronide                   | C27 H26 O18 | 0,37           | 318,0487   | 8,471    | [M-2H]-2      |

|                                                                       |             |       |          |       |             |
|-----------------------------------------------------------------------|-------------|-------|----------|-------|-------------|
| Persicogenin-hexoside isomer                                          | C23 H26 O11 | 0,15  | 477,1403 | 8,487 | [M-H]-1     |
| Apigenin 7-glucuronosyl-hexoside                                      | C27 H28 O16 | 1,06  | 607,1311 | 8,495 | [M-H]-1     |
| Isorhamnetin-O-hexoside                                               | C22 H22 O12 | 0,17  | 477,1039 | 8,497 | [M-H]-1     |
| Rhamnetin 3-galactoside                                               | C22 H22 O12 | 0,6   | 477,1041 | 8,498 | [M-H]-1     |
| Quercetin 3-rhamnosyl- (1->2) -hexoside                               | C27 H30 O16 | 0,87  | 609,1466 | 8,553 | [M-H]-1     |
| Myricetin 3-glucuronide                                               | C21 H18 O14 | 0,99  | 493,0629 | 8,604 | [M-H]-1     |
| Dicaffeoylquiniq acid isomer                                          | C25 H24 O12 | 0,78  | 515,1199 | 8,688 | [M-H]-1     |
| Cistanoside C                                                         | C30 H38 O15 | 1,5   | 637,2148 | 8,75  | [M-H]-1     |
| Trihydroxytrimethoxyflavanone                                         | C22 H22 O12 | 0,42  | 477,1041 | 8,776 | [M-H]-1     |
| Rhamnocitrin 3-galactoside                                            | C22 H22 O11 | 0,85  | 461,1093 | 8,806 | [M-H]-1     |
| Quercetin 4'-methyl ether 3-hexoside isomer                           | C22 H22 O12 | 0,19  | 477,1039 | 8,835 | [M-H]-1     |
| Eriodictyol 7-glucuronide                                             | C21 H20 O12 | 0,65  | 463,0885 | 8,857 | [M-H]-1     |
| Quercetin 3-(6"-acetylhexoside)                                       | C23 H22 O13 | 0,87  | 505,0992 | 8,899 | [M-H]-1     |
| Dicaffeoylquinic acid                                                 | C25 H24 O12 | 0,19  | 515,1196 | 8,926 | [M-H]-1     |
| Carthamidin 7-O-glucoronide isomer                                    | C21 H20 O12 | 0,71  | 463,0885 | 8,964 | [M-H]-1     |
| Scutellarein 7,4'-dimethyl ether 6-sophoroside isomer                 | C29 H34 O16 | 1,28  | 637,1782 | 8,974 | [M-H]-1     |
| Quercitrin                                                            | C21 H20 O11 | 0,79  | 447,0936 | 8,978 | [M-H]-1     |
| Luteolin 3'-methyl ether 7-hexoside                                   | C22 H22 O11 | -0,04 | 461,1089 | 8,991 | [M-H]-1     |
| Rosmarinic acid                                                       | C18 H16 O8  | 0,59  | 359,0775 | 9,007 | [M-H]-1     |
| Apigenin 7,4'-diglucuronide                                           | C27 H26 O17 | 0,64  | 621,1101 | 9,065 | [M-H]-1     |
| Orientin 2"-O-cafeate                                                 | C30 H26 O14 | 0,53  | 609,1253 | 9,099 | [M-H]-1     |
| Scutellarin                                                           | C21 H18 O12 | 0,38  | 461,0727 | 9,193 | [M-H]-1     |
| Kaempferol 3-rhamnosyl- (1->3) (4'''-acetylramnosyl) (1->6) -hexoside | C35 H42 O20 | 1,08  | 781,2205 | 9,194 | [M-H]-1     |
| Chrysin 8-C-β-d-hexoside isomer                                       | C21 H20 O9  | 0,04  | 415,1035 | 9,233 | [M-H]-1     |
| Apigenin 8-C-hexoside                                                 | C21 H20 O10 | -0,46 | 431,0982 | 9,274 | [M-H]-1     |
| Dicaffeoylquinic acid isomer                                          | C25 H24 O12 | 0,37  | 515,1197 | 9,335 | [M-H]-1     |
| Dicaffeoylquiniq acid isomer                                          | C25 H24 O12 | 0,26  | 515,1196 | 9,473 | [M-H]-1     |
| Isorhamnetin 3-glucuronide                                            | C22 H20 O13 | 0,43  | 491,0833 | 9,479 | [M-H]-1     |
| Kaempferol 3- (6"-acetylhexoside) -7-rhamnoside                       | C29 H32 O16 | 0,65  | 635,1622 | 9,511 | [M-H]-1     |
| 6-Hydroxyluteolin 6-glucuronide                                       | C21 H18 O13 | 0,52  | 459,0572 | 9,529 | [M-H-H2O]-1 |
| Isorhamnetin 3-glucuronide isomer                                     | C22 H20 O13 | 0,28  | 491,0833 | 9,624 | [M-H]-1     |
| Pinostrobin 5-O-glucoside                                             | C22 H24 O9  | 0,37  | 431,1349 | 9,717 | [M-H]-1     |
| Norwogonin                                                            | C22 H22 O10 | 0,77  | 445,1144 | 9,735 | [M-H]-1     |
| 2"-O-Feruloylorientin                                                 | C31 H28 O14 | 1,2   | 623,1414 | 9,801 | [M-H]-1     |
| 2"-trans-Caffeoylisoorientin                                          | C30 H26 O14 | 0,64  | 609,1254 | 9,815 | [M-H]-1     |
| Quercetin 7-glucuronide                                               | C21 H18 O13 | 0,82  | 477,0679 | 9,862 | [M-H]-1     |
| Quercetin 7-xyloside                                                  | C20 H18 O11 | 1,27  | 433,0782 | 9,87  | [M-H]-1     |
| Lutonarin (Isoorientin 7-glucoside)                                   | C27 H30 O16 | 0,92  | 609,1467 | 9,892 | [M-H]-1     |
| Baicalein 6-glucuronide                                               | C21 H18 O11 | 0,42  | 445,0778 | 9,916 | [M-H]-1     |
| Isorhamnetin 3-glucuronide                                            | C22 H20 O13 | 0,81  | 491,0835 | 9,945 | [M-H]-1     |

|                                                               |             |       |          |        |             |
|---------------------------------------------------------------|-------------|-------|----------|--------|-------------|
| Apigenin 7,4'-diglucuronide isomer                            | C27 H26 O17 | 0,92  | 621,1103 | 9,963  | [M-H]-1     |
| Pinosylvin                                                    | C14 H12 O2  | -4,3  | 211,0755 | 10,097 | [M-H]-1     |
| 5,8,3',4'-Tetrahydroxy-6,7-dimethoxyflavone                   | C17 H14 O8  | -0,2  | 345,0615 | 10,14  | [M-H]-1     |
| Oroxylin A                                                    | C16 H12 O5  | 0,29  | 283,0613 | 10,159 | [M-H]-1     |
| Kaempferol 3- (4'',6''-diacetylhexoside) -7-rhamnoside isomer | C31 H34 O17 | 1,35  | 677,1732 | 10,196 | [M-H]-1     |
| Kaempferol                                                    | C15 H10 O6  | 0,6   | 285,0406 | 10,237 | [M-H]-1     |
| Vitexin                                                       | C21 H20 O10 | 0,64  | 491,1197 | 10,426 | [M-H+HAc]-1 |
| Kaempferol 3- (4'',6''-diacetylhexoside) -7-rhamnoside isomer | C31 H34 O17 | 1,32  | 677,1732 | 10,671 | [M-H]-1     |
| Kaempferol 3- (4'',6''-diacetylhexoside) -7-rhamnoside        | C31 H34 O17 | 0,63  | 677,1728 | 10,687 | [M-H]-1     |
| Quercitrin isomer                                             | C21 H20 O11 | 0,9   | 447,0937 | 10,798 | [M-H]-1     |
| Naringenin                                                    | C15 H12 O5  | 1,03  | 271,0615 | 10,832 | [M-H]-1     |
| Dihydroxydimethoxyflavanone                                   | C23 H22 O12 | 0,28  | 489,1040 | 10,972 | [M-H]-1     |
| Apigenin 8-C- (6''-acetylhexoside)                            | C23 H22 O11 | 1,25  | 473,1095 | 11,148 | [M-H]-1     |
| Baicalein 6-methyl ether 7-glucuronide                        | C22 H20 O11 | 0,45  | 459,0935 | 11,294 | [M-H]-1     |
| Luteolin 7-lactate                                            | C18 H14 O8  | 0,03  | 357,0616 | 11,466 | [M-H]-1     |
| Dihydroxynorwogonin                                           | C15 H12 O5  | 0,75  | 271,0614 | 11,483 | [M-H]-1     |
| Isorhamnetin                                                  | C16 H12 O7  | 1,58  | 315,0515 | 11,695 | [M-H]-1     |
| Baicalein 6-glucuronide                                       | C21 H18 O11 | -0,03 | 445,0776 | 11,703 | [M-H]-1     |
| Apigenin 7-lactate                                            | C18 H14 O7  | -0,06 | 341,0667 | 11,716 | [M-H]-1     |
| Naringenin 7-O-beta-D-hexoside 6''-acetate                    | C23 H24 O11 | 0,78  | 475,1250 | 11,739 | [M-H]-1     |
| Oroxylin A glucuronide                                        | C22 H20 O11 | -0,18 | 459,0932 | 11,86  | [M-H]-1     |
| Wogonin                                                       | C16 H12 O5  | -0,69 | 283,0610 | 11,867 | [M-H]-1     |
| Tenaxin II                                                    | C16 H12 O6  | -0,83 | 299,0559 | 11,936 | [M-H]-1     |
| Viscidulin II                                                 | C17 H14 O7  | 0,14  | 311,0562 | 12,032 | [M-H-H2O]-1 |
| Quercitrin                                                    | C21 H20 O11 | 0,6   | 447,0936 | 12,332 | [M-H]-1     |
| Wogonin isomer                                                | C16 H12 O5  | -0,54 | 283,0610 | 12,428 | [M-H]-1     |
| Oroxylin A glucuronide isomer                                 | C22 H20 O11 | 0,25  | 459,0934 | 12,43  | [M-H]-1     |
| Pinosylvin                                                    | C14 H12 O2  | -2,51 | 211,0759 | 12,435 | [M-H]-1     |
| Apigenin 7-lactate isomer                                     | C18 H14 O7  | 0,28  | 341,0668 | 12,525 | [M-H]-1     |
| Oroxylin A glucuronide                                        | C22 H20 O11 | 0,64  | 459,0936 | 12,98  | [M-H]-1     |
| Pinocembrin                                                   | C15 H12 O4  | -0,64 | 255,0661 | 13,045 | [M-H]-1     |
| Chrysin                                                       | C15 H10 O4  | -0,03 | 253,0506 | 13,061 | [M-H]-1     |
| Baicalein 6-glucuronide                                       | C21 H18 O11 | 0,62  | 445,0779 | 13,166 | [M-H]-1     |
| Oroxylin A glucuronide isomer                                 | C22 H20 O11 | 0,7   | 459,0936 | 13,169 | [M-H]-1     |
| Scutellarein 7-glucuronide-6-ferulate                         | C31 H26 O15 | 1,4   | 637,1208 | 13,599 | [M-H]-1     |
| Chrysin 7-glucuronide                                         | C21 H18 O10 | 0,28  | 429,0828 | 14,405 | [M-H]-1     |
| Pinocembrin isomer                                            | C15 H12 O4  | 0,04  | 255,0663 | 14,458 | [M-H]-1     |
| Baicalein 6-glucuronide                                       | C21 H18 O11 | -0,18 | 445,0775 | 14,881 | [M-H]-1     |
| Genistein                                                     | C15 H10 O5  | 1,08  | 269,0458 | 16,047 | [M-H]-1     |
